# Supplementary material for: Genomic prediction using imputed whole-genome sequence data in Holstein Friesian cattle
Source: PubMed Central journal article supplement (PMC4574568; doi:10.1186/s12711-015-0149-x), 2015-09-17
Supplement: 12711_2015_149_MOESM1_ESM.pdf [file 12711_2015_149_MOESM1_ESM.pdf]

## Additional file 1

### Conditional posterior densities BSSVS model

The conditional posterior density of  $\alpha_j$  is:

$$N\left(\hat{\alpha}_j; \frac{\omega_j \hat{\sigma}_e^2}{\mathbf{x}_j' \mathbf{D}^{-1} \mathbf{x}_j + \lambda_j}\right)$$

where  $\hat{\alpha}_j$  is the conditional mean of the allele substitution effect at locus  $j$ ,  $\lambda_j = \frac{\omega_j \hat{\sigma}_e^2}{\hat{\sigma}_\alpha^2}$ , where

$\omega_j = 1$  (if  $I_j = 1$ ) or  $\omega_j = 100$  (if  $I_j = 0$ ). The conditional posterior density of  $\sigma_\alpha^2$  was:

$\sigma_\alpha^2 | \alpha \sim \chi^{-2}(v_\alpha + n, S_\alpha^2 + \boldsymbol{\omega}' \hat{\boldsymbol{\alpha}}^2)$ , where  $\hat{\boldsymbol{\alpha}}^2$  is a vector of squares of the current estimates of the allele substitution effects of all loci, that is weighted by vector  $\boldsymbol{\omega}$ . The conditional posterior distribution of  $I_j$  was:

$$\Pr(I_j = 1) = \frac{f(r_j | I_j = 1)(1 - \pi)}{f(r_j | I_j = 0)\pi + f(r_j | I_j = 1)(1 - \pi)}$$

where  $r_j = \mathbf{x}_j' \mathbf{D}^{-1} \mathbf{y}^* + \mathbf{x}_j' \mathbf{D}^{-1} \mathbf{x}_j \hat{\alpha}_j$  where  $\mathbf{y}^*$  are the conditional DRPs (i.e. for each SNP  $\mathbf{y}$

minus the sum of the estimated SNP effects of the other SNPs), and  $f(r_j | I_j = \delta)$  is the

probability density function, giving the probability that  $I_j = 0$  ( $\delta = 0$ ) or  $I_j = 1$  ( $\delta = 1$ ), and

is proportional to  $\frac{1}{\sqrt{v}} e^{-\frac{r_j^2}{2v}}$ , where  $v = (\mathbf{x}_j' \mathbf{D}^{-1} \mathbf{x}_j)^2 \frac{\sigma_{\alpha_j}^2}{\omega_j} + \mathbf{x}_j' \mathbf{D}^{-1} \mathbf{x}_j \sigma_e^2$ . The conditional posterior

density of  $\sigma_u^2$  and  $\sigma_e^2$  were inverse- $\chi^2$  distributions, respectively  $\sigma_u^2 | \mathbf{u} \sim \chi^{-2}(m - 2, \mathbf{u}' \mathbf{A}^{-1} \mathbf{u})$

and  $\sigma_e^2 | \mathbf{e} \sim \chi^{-2}(m - 2, \mathbf{e}' \mathbf{D}^{-1} \mathbf{e})$ , where  $m$  is the number of animals in the pedigree.
