# Supplementary material for: Genomic prediction using imputed whole-genome sequence data in Holstein Friesian cattle
Source: PubMed Central journal article supplement (PMC4574568; doi:10.1186/s12711-015-0149-x), 2015-09-17
Supplement: 12711_2015_149_MOESM3_ESM.pdf [file 12711_2015_149_MOESM3_ESM.pdf]

## Additional file 3

Table S1 – Correlations between predictions of the different models

|     |                   | <b>Pedigree - BLUP</b> | <b>BovineHD - GBLUP</b> | <b>ImputedHD - GBLUP</b> | <b>Sequence - GBLUP</b> | <b>BovineHD - BSSVS</b> | <b>ImputedHD - BSSVS</b> |
|-----|-------------------|------------------------|-------------------------|--------------------------|-------------------------|-------------------------|--------------------------|
| SCS | BovineHD - GBLUP  | 0.751                  |                         |                          |                         |                         |                          |
|     | ImputedHD - GBLUP | 0.721                  | 0.975                   |                          |                         |                         |                          |
|     | Sequence - GBLUP  | 0.720                  | 0.973                   | 0.996                    |                         |                         |                          |
|     | BovineHD - BSSVS  | 0.792                  | 0.995                   | 0.969                    | 0.967                   |                         |                          |
|     | ImputedHD - BSSVS | 0.765                  | 0.973                   | 0.993                    | 0.993                   | 0.976                   |                          |
|     | Sequence - BSSVS  | 0.765                  | 0.974                   | 0.992                    | 0.995                   | 0.977                   | 0.998                    |
| IFL | BovineHD - GBLUP  | 0.700                  |                         |                          |                         |                         |                          |
|     | ImputedHD - GBLUP | 0.678                  | 0.967                   |                          |                         |                         |                          |
|     | Sequence - GBLUP  | 0.680                  | 0.967                   | 0.996                    |                         |                         |                          |
|     | BovineHD - BSSVS  | 0.795                  | 0.978                   | 0.948                    | 0.949                   |                         |                          |
|     | ImputedHD - BSSVS | 0.796                  | 0.954                   | 0.972                    | 0.973                   | 0.977                   |                          |
|     | Sequence - BSSVS  | 0.771                  | 0.961                   | 0.979                    | 0.983                   | 0.977                   | 0.997                    |
| PY  | BovineHD - GBLUP  | 0.729                  |                         |                          |                         |                         |                          |
|     | ImputedHD - GBLUP | 0.717                  | 0.965                   |                          |                         |                         |                          |
|     | Sequence - GBLUP  | 0.715                  | 0.964                   | 0.996                    |                         |                         |                          |
|     | BovineHD - BSSVS  | 0.766                  | 0.992                   | 0.959                    | 0.959                   |                         |                          |
|     | ImputedHD - BSSVS | 0.758                  | 0.959                   | 0.988                    | 0.989                   | 0.968                   |                          |
|     | Sequence - BSSVS  | 0.762                  | 0.964                   | 0.991                    | 0.995                   | 0.967                   | 0.994                    |

**Table S2 – Estimates of genetic parameters for GBLUP model including polygenic component**

Estimates of additive genetic variance ( $\sigma_g^2$ ), heritability ( $h^2$ ), regression coefficient ( $b$ ), and prediction reliability ( $r^2$ ) for somatic cell score using three types of genomic data.

| <b>Data</b>      | <b><math>\sigma_g^2</math></b> | <b><math>h^2</math></b> | <b><math>b^{(1)}</math></b> | <b><math>r^2^{(2)}</math></b> |
|------------------|--------------------------------|-------------------------|-----------------------------|-------------------------------|
| <b>BovineHD</b>  | 18.44                          | 0.95                    | 1.12                        | 0.51                          |
| <b>ImputedHD</b> | 19.00                          | 0.99                    | 1.14                        | 0.49                          |
| <b>Sequence</b>  | 18.82                          | 0.98                    | 1.16                        | 0.49                          |

<sup>1</sup> Standard error of the regression coefficient ranged between 0.02 and 0.03

<sup>2</sup> Standard error of the prediction reliability was 0.02.
